# Supplementary material for: Berberine inhibits adipocyte differentiation, proliferation and adiposity through down-regulating galectin-3
Source: PubMed Central journal article supplement (PMC6746795; doi:10.1038/s41598-019-50103-5), 2019-09-16

## Supplementary Information

### **Berberine inhibits adipocyte differentiation, proliferation and adiposity through down-regulating galectin-3**

Can Wang<sup>1</sup>, Yan Wang<sup>2</sup>, Shu-Rong Ma<sup>2</sup>, Zeng-Yan Zuo<sup>3</sup>, Yan-Bin Wu<sup>3</sup>, Wei-Jia Kong<sup>3</sup>,  
Ai-Ping Wang<sup>1</sup> & Jian-Dong Jiang<sup>2</sup>

<sup>1</sup>New Drug Safety Evaluation Center, Institute of Materia Medica, Chinese Academy of Medical Sciences and Peking Union Medical College, Beijing, China. <sup>2</sup>State Key Laboratory of Bioactive Natural Products and Function, Institute of Materia Medica, Chinese Academy of Medical Sciences and Peking Union Medical College, Beijing, China. <sup>3</sup>Department of Virology & NHC Key Laboratory of Biotechnology of Antibiotics, Institute of Medicinal Biotechnology, Chinese Academy of Medical Sciences and Peking Union Medical College, Beijing, China.

Correspondence and requests for materials should be addressed to W.J.K. (email: wjkong894@163.com), A.P.W. (email: wangaiping@imm.ac.cn), and J.D.J. (email: jiangjd@imm.ac.cn).

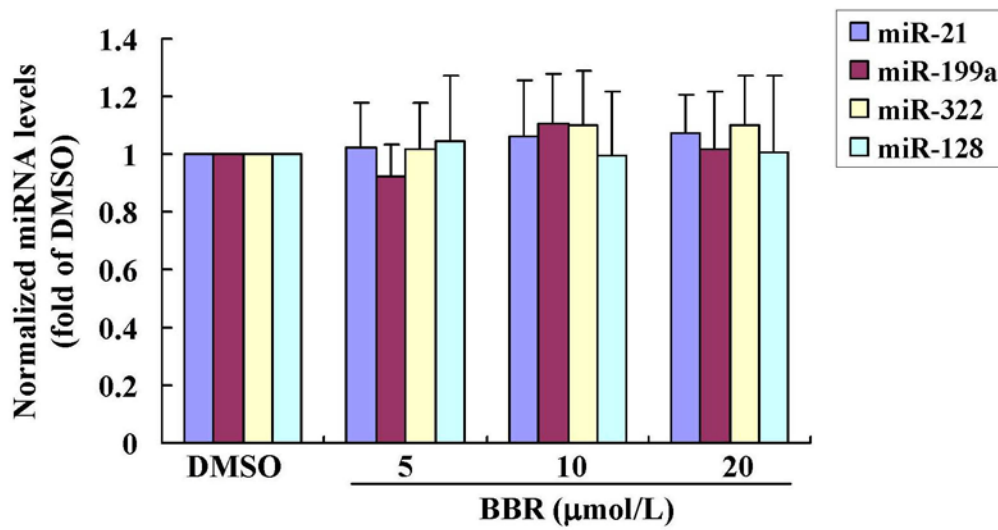

**Supplementary Figure 1.** Effects of BBR on the expression levels of miR-21, miR-199a, miR-322, and miR-128. Mouse primary preadipocytes were treated with DMSO or different concentrations of BBR for 72 h. After treatment, cells were harvested; the expression levels of indicated miRNAs were analyzed by real-time RT-PCR. The results were normalized to RNU6-2 and presented as fold of DMSO. Values are mean  $\pm$  SD of 4 separate experiments.



Supplementary Table 1 Mouse primers for quantitative real-time PCR (5'-3').

| Gene           | Forward primer       | Reverse primer         |
|----------------|----------------------|------------------------|
| Gal-3          | CAGTGCTCCTGGAGGCTATC | ATTGAAGCGGGGGTTAAAGT   |
| PPAR $\gamma$  | CGCTGATGCACTGCCTATGA | AGAGGTCCACAGAGCTGATTCC |
| C/EBP $\alpha$ | CGCAAGAGCCGAGATAAAGC | CACGGCTCAGCTGTTCCA     |
| aP2            | CATGGCCAAGCCCAACAT   | CGCCCAGTTTGAAGGAAATC   |
| ACTB           | GGCTGTATTCCCCTCCATCG | CCAGTTGGTAACAATGCCATGT |

**Full blot Fig. 2A**

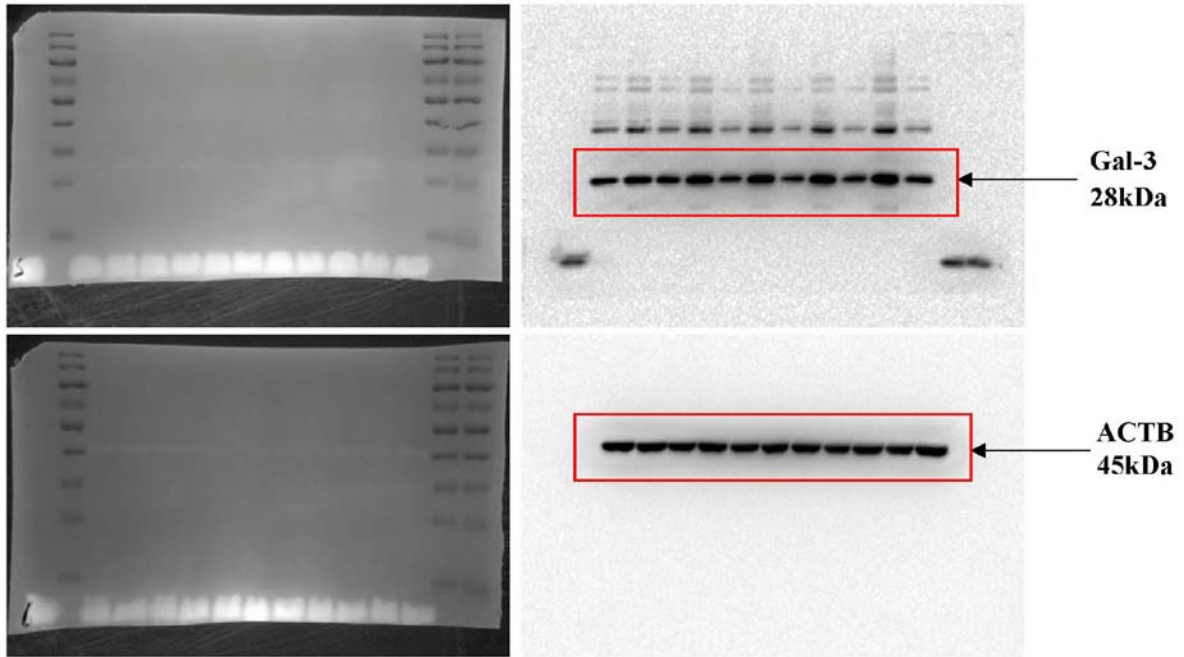

**Full blot Fig. 2C**

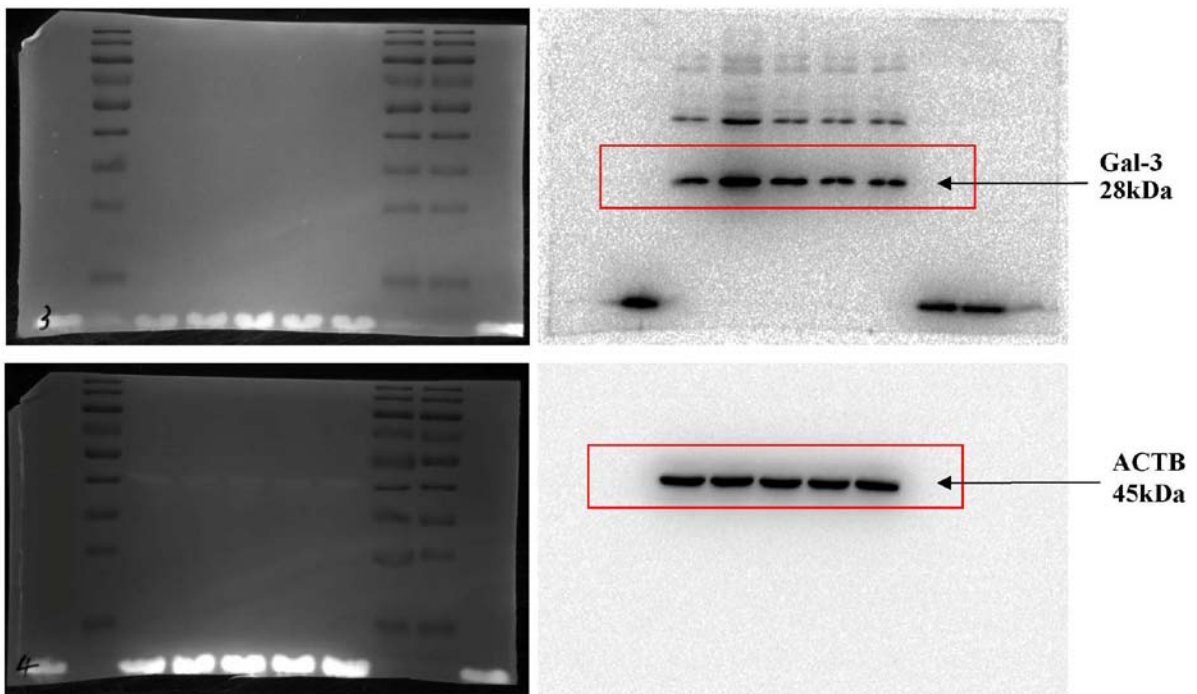

### Full blot Fig. 3A

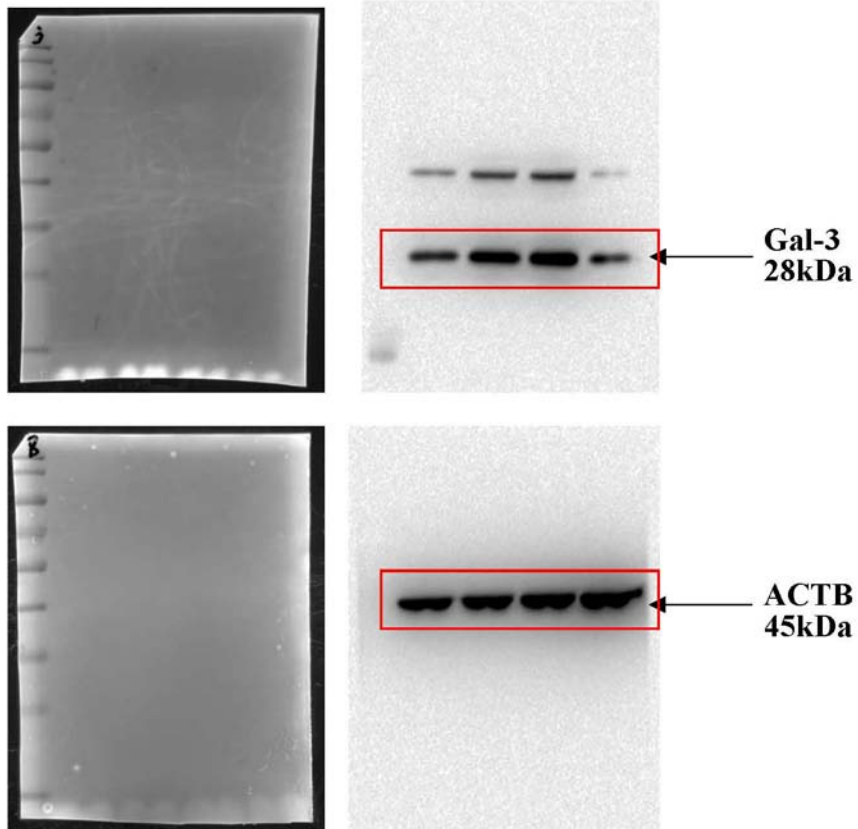

**Full blot Fig. 4A**

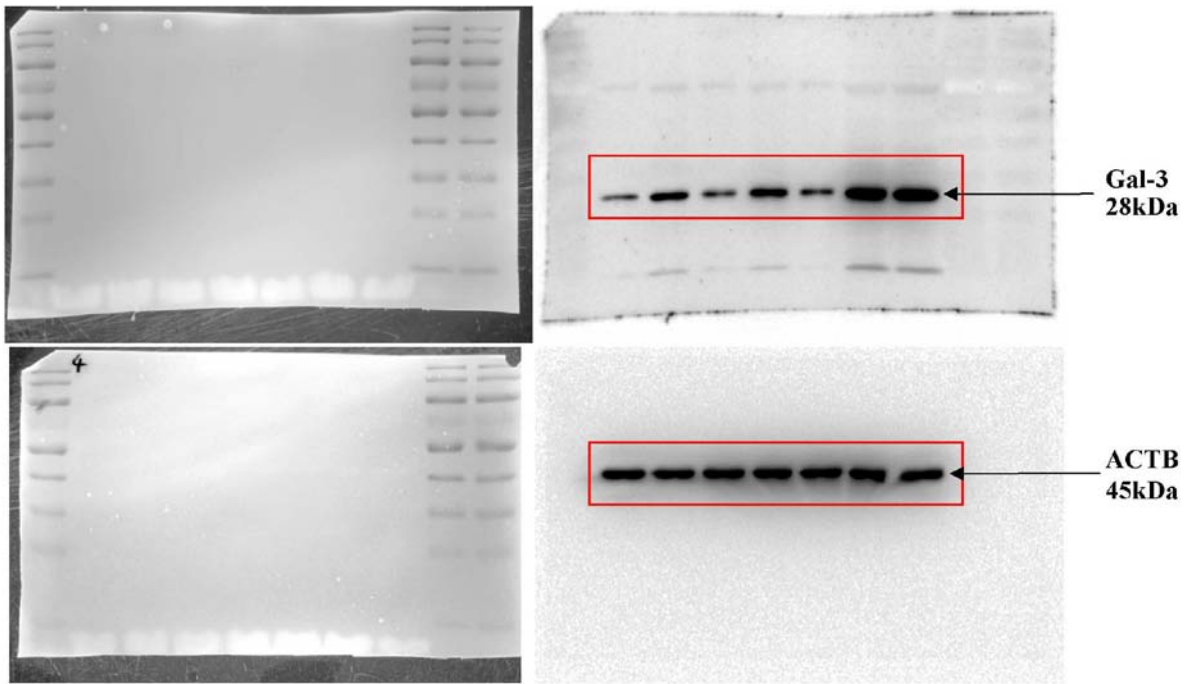

**Full blot Fig. 6A**

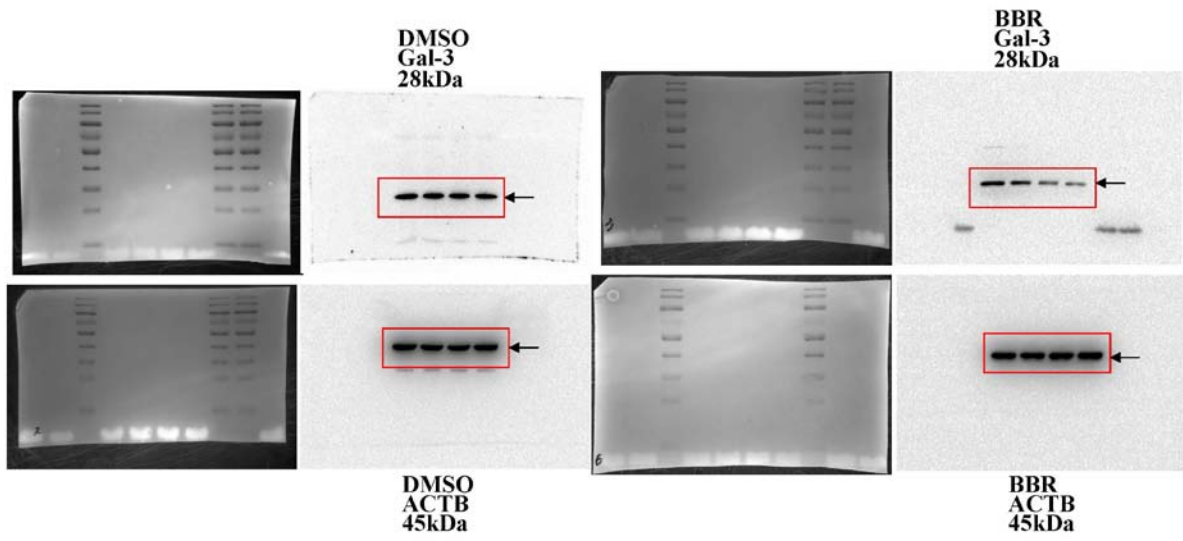

**Full blot Fig. 6B**

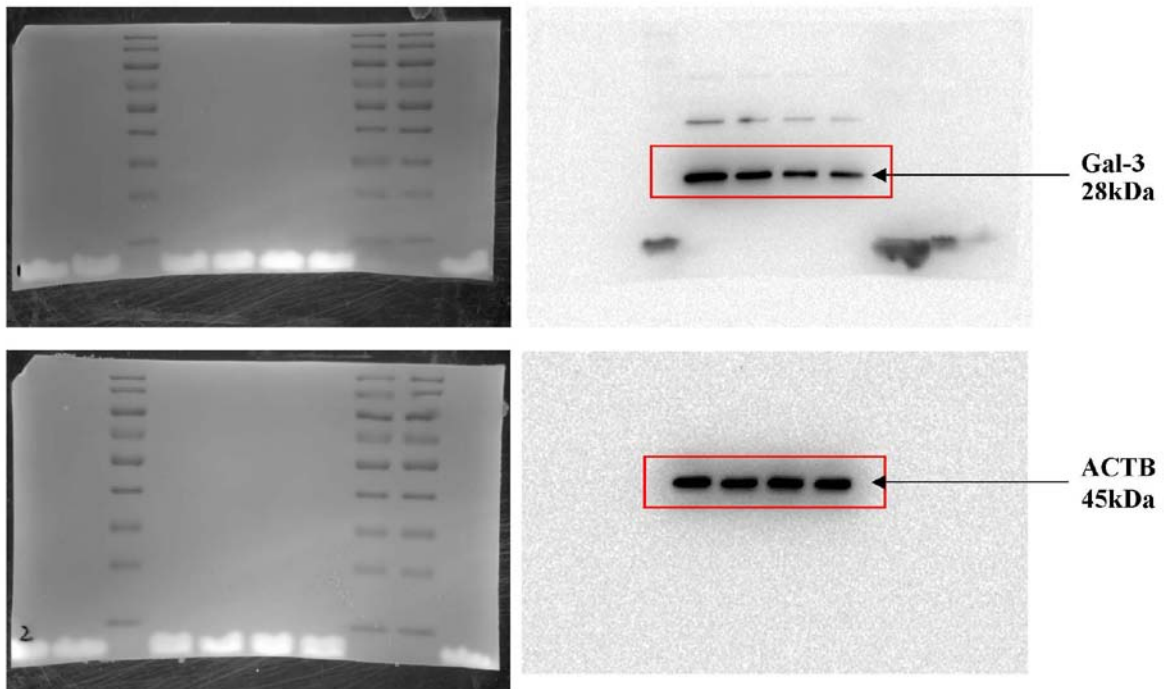



**Full blot Fig. 7A**

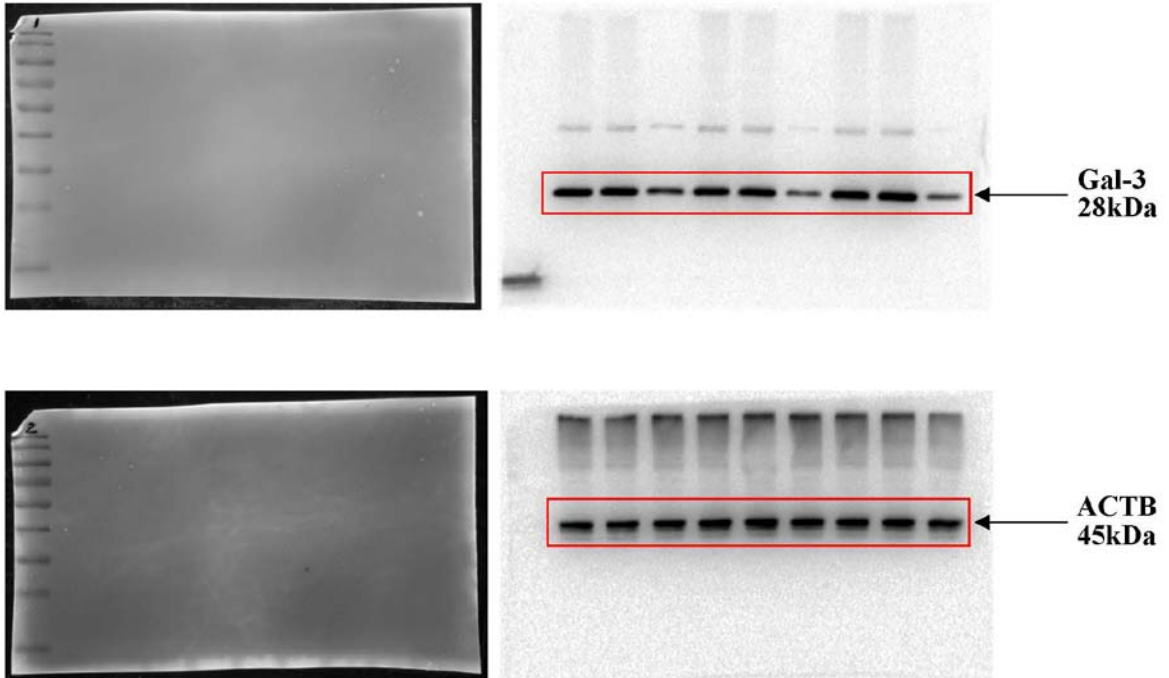

**Full blot Fig. 8A**

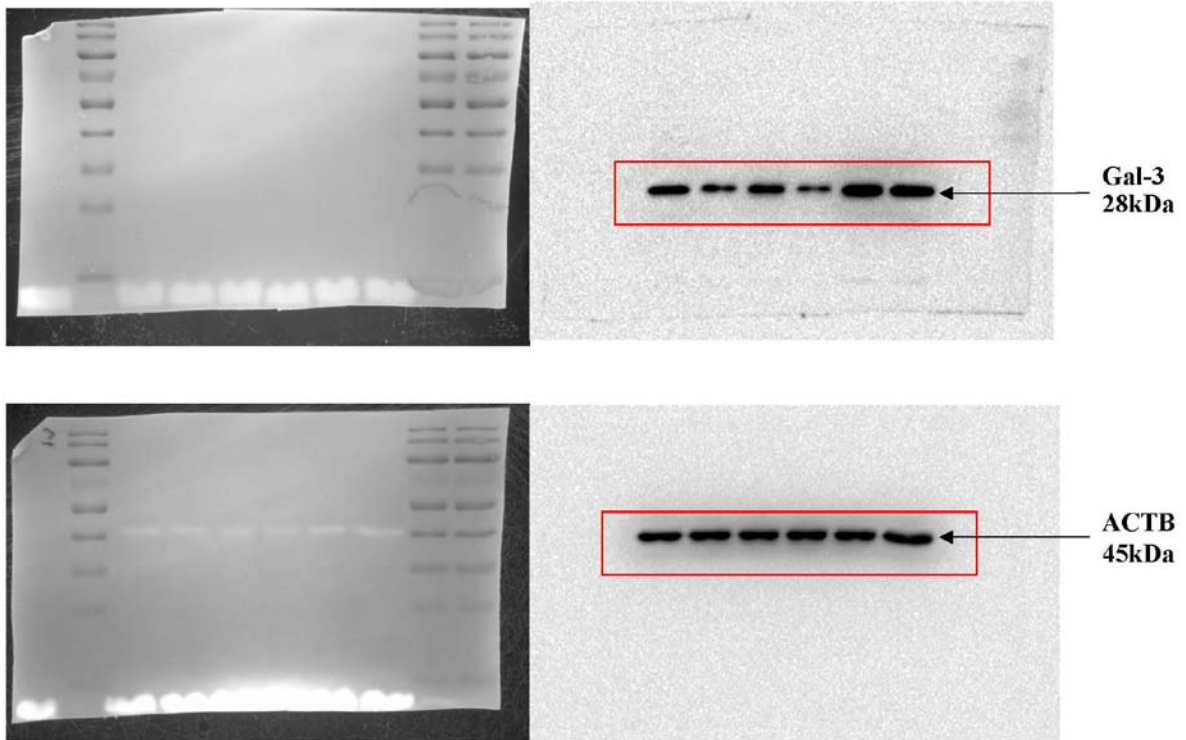

Supplement: 41598_2019_50103_MOESM1_ESM.pdf [file 41598_2019_50103_MOESM1_ESM.pdf]
